# Supplementary material
Source: PubMed Central journal article supplement (PMC5710419)
Supplement: jamasurg-e172350-s001.pdf [file jamasurg-e172350-s001.pdf]

## Supplementary Online Content

Jones CE, Graham LA, Morris MS, et al. Association between preoperative hemoglobin A<sub>1c</sub>, postoperative hyperglycemia, and readmissions following gastrointestinal surgery. *JAMA Surg*. Published online July 26, 2017. doi:10.1001/jamasurg.2017.2350

**eTable.** Characteristics of Patients Missing Preoperative HbA<sub>1c</sub> or Preoperative Glucose

This supplementary material has been provided by the authors to give readers additional information about their work.

**Supplemental Table: Characteristics of Patients Missing Preoperative HbA1c or Preoperative Glucose**

|                                     | Preoperative HbA1c |               |               |               |         | Preoperative Glucose |               |              |              |         |
|-------------------------------------|--------------------|---------------|---------------|---------------|---------|----------------------|---------------|--------------|--------------|---------|
|                                     | Not Missing        |               | Missing       |               | p-value | Not Missing          |               | Missing      |              | p-value |
|                                     | N / Mean           | (%) / (SD)    | N / Mean      | (%) / (SD)    |         | N / Mean             | (%) / (SD)    | N / Mean     | (%) / (SD)   |         |
| <b>Overall</b>                      | <b>38,188</b>      | <b>(42.6)</b> | <b>51,440</b> | <b>(57.4)</b> |         | <b>81,025</b>        | <b>(90.4)</b> | <b>8,603</b> | <b>(9.6)</b> |         |
| <b>Patient Factors</b>              |                    |               |               |               |         |                      |               |              |              |         |
| Age, Mean (SD)                      | 63.7               | (10.7)        | 61.8          | (13.1)        | <.001   | 62.7                 | (12.2)        | 61.4         | (12.0)       | <.001   |
| Gender, n (%)                       |                    |               |               |               | <.001   |                      |               |              |              | 0.16    |
| Female                              | 2,119              | (5.6)         | 3,497         | (6.8)         |         | 5,047                | (6.2)         | 569          | (6.6)        |         |
| Male                                | 36,069             | (94.5)        | 47,943        | (93.2)        |         | 75,978               | (93.8)        | 8,034        | (93.4)       |         |
| BMI, Mean (SD)                      | 29.9               | (7.2)         | 27.4          | (7.6)         | <.001   | 28.5                 | (7.6)         | 28.6         | (7.1)        | 0.15    |
| Race, n (%)                         |                    |               |               |               | 0.77    |                      |               |              |              | <.001   |
| White                               | 26,463             | (81.0)        | 35,383        | (81.2)        |         | 55,645               | (80.8)        | 6,201        | (83.7)       |         |
| Black                               | 5,823              | (17.8)        | 7,679         | (17.6)        |         | 12,390               | (18.0)        | 1,112        | (15.0)       |         |
| Other                               | 403                | (1.2)         | 541           | (1.2)         |         | 850                  | (1.2)         | 94           | (1.3)        |         |
| ASA Classification, n (%)           |                    |               |               |               | <.001   |                      |               |              |              | <.001   |
| 1-2                                 | 4,976              | (13.0)        | 12,472        | (24.3)        |         | 15,399               | (19.0)        | 2,049        | (23.8)       |         |
| 3                                   | 27,987             | (73.3)        | 33,437        | (65.0)        |         | 55,586               | (68.6)        | 5,838        | (67.9)       |         |
| 4-5                                 | 5,219              | (13.7)        | 5,521         | (10.7)        |         | 10,026               | (12.4)        | 714          | (8.3)        |         |
| Diabetes Mellitus, n (%)            |                    |               |               |               | <.001   |                      |               |              |              | <.001   |
| Non-Diabetic                        | 20,342             | (53.3)        | 47,829        | (93.0)        |         | 60,914               | (75.2)        | 7,257        | (84.4)       |         |
| NIDDM                               | 9,901              | (25.9)        | 2,322         | (4.5)         |         | 11,384               | (14.1)        | 839          | (9.8)        |         |
| IDDM                                | 7,945              | (20.8)        | 1,289         | (2.5)         |         | 8,727                | (10.8)        | 507          | (5.9)        |         |
| Postoperative LOS, days, (Mean, SD) | 6.5                | (5.0)         | 6.4           | (5.0)         | 0.01    | 6.5                  | (5.1)         | 6.2          | (4.8)        | <.001   |
| Glucose (Mean, SD)                  |                    |               |               |               |         |                      |               |              |              |         |
| Closest preoperative                | 132.1              | (53.0)        | 110           | (32.3)        | <.001   | 119.6                | (43.9)        |              |              |         |
| Closest postoperative               | 157.1              | (54.2)        | 133.2         | (42.3)        | <.001   | 144.2                | (49.7)        | 139.3        | (44.3)       | <.001   |
| Highest postoperative               | 178.2              | (68.5)        | 142.5         | (52.3)        | <.001   | 159.1                | (63.3)        | 149.2        | (51.9)       | <.001   |
| <b>Outcomes</b>                     |                    |               |               |               |         |                      |               |              |              |         |
| Any postoperative complication      | 30,938             | (81.0)        | 42,328        | (82.3)        | <.001   | 66,099               | (81.6)        | 7,167        | (83.3)       | <.001   |
| All Infectious Complications        |                    |               |               |               |         |                      |               |              |              |         |
| Wound Infection                     | 2,196              | (5.8)         | 2,854         | (5.6)         | 0.19    | 4,541                | (5.6)         | 509          | (5.9)        | 0.23    |
| Pneumonia                           | 504                | (1.3)         | 739           | (1.4)         | 0.14    | 1,140                | (1.4)         | 103          | (1.2)        | 0.11    |
| Urinary Tract Infection             | 793                | (2.1)         | 1,009         | (2.0)         | 0.22    | 1,639                | (2.0)         | 163          | (1.9)        | 0.42    |
| Sepsis                              | 772                | (2.0)         | 968           | (1.9)         | 0.13    | 1,563                | (1.9)         | 177          | (2.1)        | 0.41    |
| Post-discharge                      |                    |               |               |               |         |                      |               |              |              |         |

|                               |       |        |       |        |       |        |        |       |        |       |
|-------------------------------|-------|--------|-------|--------|-------|--------|--------|-------|--------|-------|
| outcomes                      |       |        |       |        |       |        |        |       |        |       |
| Readmission within<br>14 Days | 3,891 | (10.2) | 4,817 | (9.4)  | <.001 | 7,949  | (9.8)  | 759   | (8.8)  | 0.003 |
| Readmission within<br>30 Days | 5,448 | (14.3) | 6,688 | (13.0) | <.001 | 11,118 | (13.7) | 1,018 | (11.8) | <.001 |
